# Chaetocin exhibits anticancer effects in esophageal squamous cell carcinoma via activation of Hippo pathway

Lin Li<sup>1,2,\*</sup>, Hangyu Jiang<sup>1,3,\*</sup>, Yuqi Li<sup>4</sup>, Xiaochong Xiang<sup>5</sup>, Yueming Chu<sup>1,3</sup>, Jie Tang<sup>6</sup>, Kang Liu<sup>5</sup>, Danqun Huo<sup>2</sup>, Xiaofen Zhang<sup>1,&</sup>

<sup>1</sup>Department of Pharmacy, The Second Clinical Medical College of North Sichuan Medical College, Nanchong, China

<sup>2</sup>Key Laboratory for Biorheological Science and Technology of Ministry of Education, Bioengineering College of Chongqing University, Chongqing, China

<sup>3</sup>School of Pharmacy, North Sichuan Medical College, Nanchong, China

<sup>4</sup>Department of Pharmacy, Nanchong Traditional Chinese Medicine Hospital, Nanchong, China

<sup>5</sup>Institute of Tissue Engineering and Stem Cells, The Second Clinical Medical College of North Sichuan Medical College, Nanchong, China

<sup>6</sup>Nanchong Key Laboratory of Individualized Drug Therapy, Nanchong, China

\*Equal contribution and share first authorship

**Correspondence to:** Danqun Huo, Xiaofen Zhang; email: [huodq@cqu.edu.cn](mailto:huodq@cqu.edu.cn); [spacewalker@tom.com](mailto:spacewalker@tom.com), <https://orcid.org/0000-0002-6475-8369>

**Keywords:** esophageal squamous cell carcinoma, chaetocin, ROS, Hippo pathway, apoptosis

**Received:** February 28, 2023

**Accepted:** May 27, 2023

**Published:** June 14, 2023

**Copyright:** © 2023 Li et al. This is an open access article distributed under the terms of the [Creative Commons Attribution License](https://creativecommons.org/licenses/by/3.0/) (CC BY 3.0), which permits unrestricted use, distribution, and reproduction in any medium, provided the original author and source are credited.

## ABSTRACT

Dysfunction of the Hippo pathway is common in esophageal squamous carcinoma (ESCC). Chaetocin, a small molecular compound isolated from the marine fungus, exhibits potent anticancer effects. However, the anticancer effects of chaetocin on ESCC and its potential relationship to Hippo pathway remain unclear. Here, we demonstrated that chaetocin dramatically inhibited the proliferation in ESCC cells by causing cycle arrest in the M phase and activating the caspase-dependent apoptosis signaling pathway *in vitro*, and we also found that chaetocin induced the accumulation cellular reactive oxygen species (ROS). The RNA-seq analysis indicated that the Hippo pathway is one of the most enriched pathways after chaetocin treatment. We further revealed that chaetocin triggered the activation of Hippo pathway in ESCC cells, which is characterized by elevated phosphorylation levels of almost all core proteins in Hippo pathway, such as MST1 (Thr183), MST2 (Thr180), MOB1 (Thr35), LAST1 (Thr1079 and Ser909) and YAP (Ser127), ultimately leading to decreased nuclear translocation of YAP. Moreover, the MST1/2 inhibitor XMU-MP-1 not only partially rescued the inhibitory effect chaetocin-induced proliferation, but also rescued the chaetocin-induced apoptosis in ESCC cells. Furthermore, *in vivo* results confirmed the antitumor effect of chaetocin and its relationship with Hippo pathway. Taken together, our study demonstrates that chaetocin exhibits anticancer effects in ESCC via activation of Hippo pathway. These results provide an important basis for further research of chaetocin as a potential candidate for ESCC treatment.

## INTRODUCTION

Esophageal cancer (EC) is reported to be the seventh most common cancer worldwide and the sixth cancer in

terms of mortality overall in 2020 [1]. Esophageal squamous cell carcinoma (ESCC) is the predominant histological type of EC, especially in China and other East Asian countries [2]. Although the overall survival

of EC has improved in recent decades due to medicine development, the 5-year overall survival rate of ESCC remains at only 15–25% [3, 4]. The main causes of treatment failure are recurrence and metastasis concurrent with treatment resistance [4, 5]. It is thus critical to identify novel agents with better efficacy for ESCC treatment.

The Hippo pathway, originally discovered in *Drosophila*, was an extremely evolutionarily conserved pathway [6]. The core components of Hippo pathway of mammal consist of MTS1/2, LATS1/2, SAV1, MOB1, YAP, TAZ, and TEADs [7]. Dysfunction of the Hippo pathway is common and controls multiple biological processes in cancer, including tumorigenesis, aggressiveness, invasion, migration, metastasis [7, 8]. Compared with normal mucosa, frequent inactivation mutations of Hippo pathway have been confirmed and validated in ESCC [4, 9, 10]. Increasing evidence suggests that the upstream core kinases of Hippo pathway act as tumor suppressors whereas downstream YAP/TAZ as oncogenes, such as ESCC [11–13]. Several studies have revealed that YAP/TAZ were overexpressed and promoted cell proliferation, invasion, migration, metastasis and drug resistance in ESCC [11, 12, 14]. Therefore, the Hippo pathway plays a pivotal role in ESCC, and the pathway has become an attractive target for therapeutic development. Recent research has pointed out how the Hippo pathway and oxidative stress are related and illustrated how ROS might stimulate the Hippo pathway [15]. Therefore, some small molecule targeting ROS/Hippo is being investigated. It was reported that alantolactone suppresses YAP1/TAZ by stimulating the generation of reactive oxygen species, thus suppressing the growth of tumors [16].

Chaetocin is a small molecular compound isolated from the marine fungus genus *Chaetomium*. Previous studies have revealed that chaetocin has multiple pharmacological activities, such as antiviral, antiparasitic, anti-gout and cardiovascular protective effects [17–20]. We have reviewed recent studies showing that chaetocin exhibits potent inhibitory effects against a variety type of cancers [21–23]. However, the effect of chaetocin against ESCC cells and the underlying mechanism need further elucidation.

Here, we attempt to explore the inhibitory effect of chaetocin on the biological function of ESCC cells. Moreover, whether its molecular mechanism is associated to the activation of Hippo pathway was further explored. These results provide an important basis for further research of chaetocin as a potential therapeutic candidate for ESCC treatment.

## MATERIALS AND METHODS

### Cell lines and cell culture

Human ESCC cell lines (KYSE150, Eca109, KYSE30, KYSE70, KYSE410, KYSE510, TE-1, TE-11) and normal esophageal epithelial cell (Het-1A) were provided by Institute of Tissue Engineering and Stem Cells (Nanchong, China). Seven ESCC cell lines (Eca109, KYSE30, KYSE150, KYSE410, KYSE510, TE-1, TE-11) were cultured in RPMI-1640 supplemented with 10% fetal bovine serum (FBS). Het-1A and KYSE70 were cultured in DMEM medium supplemented with 10% FBS. All cells were then incubated in a humidified atmosphere of 5% CO<sub>2</sub> at 37°C.

### Reagents and antibodies

Chaetocin (Cat. HY-N2019-10 mg), N-acetyl-L-cysteine (NAC) (Cat. HY-B0215-500 mg), XMU-MP-1 (Cat. HY-100526-5 mg), z-VAD-fmk (Cat. HY-16658B-5 mg) and Necrostatin-1 (Cat. HY-15760-10 mg) were purchased from MedChemExpress (Shanghai, China). The anti-p-Histone h3 antibody (Cat. ET1601-30), anti-PARP antibody (Cat. ET1608-56), anti-Cleaved PARP antibody (Cat. ET1608-10), anti-Caspase-3 antibody (Cat. ET1608-64), anti-Cleaved-Caspase-3 antibody (Cat. ET1608-64), anti-Bcl-2 antibody (Cat. ET1702-53) and anti-Bax antibody (Cat. ET1603-34) were purchased from HuaBio (Hangzhou, China). The anti-p-CDK1 (Thr161) antibody (Cat. BS-3481R) was purchased from BIOCSS (Beijing, China). The anti-MST1 antibody (Cat. 3682), anti-MST2 antibody (Cat. 3952), anti-p-MST1 (Thr183)/MST2 (Thr180) antibody (Cat. bs-3294R), anti-LATS1 antibody (Cat. 3477), anti-p-LATS1 (Ser909) antibody (Cat. bs-3246R), anti-p-LATS1 (Thr1079) antibody (Cat. bs-3245R), anti-MOB1 antibody (Cat. 13730), anti-p-MOB1 (Thr35) antibody (Cat. 8699), anti-SAV1 antibody (Cat. 13301), anti-YAP antibody (Cat. 14074), anti-p-YAP (Ser127) antibody (Cat. 13008), anti-p-YAP (Ser397) antibody (Cat. 13619) and GAPDH (Cat. 5174) were purchased from Cell Signaling Technology (Danvers, MA, USA).

### Cell viability assay

TE-1, KYSE150, Eca109, KYSE410, KYSE510, KYSE70, TE-11, KYSE30 and Het-1A (all at  $3 \times 10^4$  cells/well) were seeded in 96-well plates, and treated with various concentration of chaetocin for 24 h. CCK-8 assay was then performed according to our previous study [24].

### Colony formation assay

TE-1 and KYSE150 cells were seeded in a 6-well plate (500 cells/well) and treated with various concentration

of chaetocin. Cells were cultured in a 5% CO<sub>2</sub> atmosphere at 37°C for 7 d, and the culture medium was changed every 3 d. After chaetocin treatment, cells were washed with PBS, fixed with 4% paraformaldehyde, and stained with 0.5% crystal violet. Then the colonies were imaged and counted.

### EdU staining assay

The EdU-594 Detection Kit was purchased from the Beyotime Biotechnology (Shanghai, China). TE-1 and KYSE150 cells were seeded in 24-well plates at a density of  $1 \times 10^4$  cells/well, and treated with different concentrations of chaetocin (0, 0.2, 0.4, 0.8  $\mu$ M) for 24 h. Then, 20  $\mu$ M EdU was added and incubated at 37°C for 2 h to label the cells. Next, 4% paraformaldehyde was added to fix the cells, and 200  $\mu$ L 0.5% Triton X-100 was added to each well for 10 min to increase cell permeability. After the above operation, the cells were washed with PBS for 3 times, each well was added with 500  $\mu$ L click reaction solution, and incubated for 30 min in the dark. The cells were washed three times again, and 500  $\mu$ L Hoechst 33342 was added to each well to stain the nuclei at room temperature for 10 min. Finally, the samples were analyzed and imaged.

### Cell cycle analysis

TE-1 and KYSE150 cells (at  $2 \times 10^5$  cells/well) were seeded in 6-well plates, and treated with chaetocin at different concentrations (0, 0.2, 0.4, and 0.8  $\mu$ M) for 24 h. Cell cycle analysis was then performed according to our previous study [24].

### Cell apoptosis assay

The Annexin V-FITC/PI Apoptosis Kit was purchased from Vazyme Biotech (Nanjing, China). TE-1 and KYSE150 cells were seeded in 6-well plates at a density of  $2 \times 10^6$  cells/well, and treated with chaetocin at different concentrations (0, 0.2, 0.4, and 0.8  $\mu$ M) for 24 h in the presence or absence of NAC (5 mM) or z-VAD-fmk (10  $\mu$ M) before collection. The cells were analyzed by flow cytometry as previously described [25].

### ROS measurement

The ROS Assay Kit was purchased from Keygen Biotech (Jiangsu, China). TE-1 and KYSE150 cells were incubated into 6-well plates at  $1 \times 10^5$  cells/well, treated with chaetocin at different concentrations (0, 0.2, 0.4 and 0.8  $\mu$ M) for 24 h. Then, the upper suspension cells and adherent cells were collected, added with 10  $\mu$ M 2',7'-dichlorofluorescein diacetate (CM-H2DCFDA) into each cell, and incubated at 37°C for

30 min in the dark. The cells were then resuspended in 500  $\mu$ L of PBS. Finally, fluorescence measurements were performed using flow cytometry (BD Biosciences, Franklin Lakes, NJ, USA).

### Western blot analysis

TE-1 and KYSE150 cells were incubated into 10 cm plates, treated with chaetocin at different concentrations (0, 0.2, 0.4, 0.8  $\mu$ M) for 24 h. Then, the cells were collected, a mixture of RIPA buffer and protease inhibitor was added. The total protein was separated via sodium dodecyl sulfate polyacrylamide gel electrophoresis and transferred to a PVDF membrane. After soaking and shaking with 5% non-fat milk for 1 h, the PVDF membranes were incubated with primary antibodies overnight at 4°C. On the second day, the primary antibody was recovered and the secondary antibody was coupled by HRP. Incubation was done at room temperature for 1 hour for ECL detection and the film was developed.

### Immunohistochemistry

The tumor was removed 14 days after administration, fixed with 10% formaldehyde and embedded in paraffin. Then, the paraffin-embedded tissue was cut into 3- $\mu$ m sections. The sections were roasted for 20–30 minutes to evaporate the water and melt the paraffin, the antigen retrieval with 0.01 M sodium citrate buffer (pH 6.0). After adding 3% hydrogen peroxide for 15 min, sections were added with 0.1% Triton X-100 and incubated for 10 min. After 3% BSA blocking, the primary antibody Ki67, cleaved caspase-3, YAP and p-YAP were incubated for 2 h, followed by HRP secondary antibody at room temperature for 1 h. At last, the sections were visualized with 3,3'-diaminobenzidine tetrahydrochloride (DAB) imaging section and counterstained with hematoxylin.

### Xenograft mouse model

A total of 16 male BALB/c nude mice (age, 4–6 w; weight, 18–22 g) were purchased from the Academy of Military Medical Science (Beijing, China). The mice were maintained in a pathogen-free environment at 22–26°C with sufficient food and water. Following 1 w of adaptation, KYSE150 cells ( $5 \times 10^6$  cells in 150  $\mu$ L PBS) were implanted into the right flanks of the nude mice. Once the tumor sizes reached approximately 100 mm<sup>3</sup>, tumor-bearing mice with similar tumor volumes were randomly grouped ( $n = 8$  per group). Groups were assigned to intraperitoneally receive the vehicle (2% DMSO) or chaetocin (0.5 mg/kg/d) groups for 14 d prior to sacrifice. Tumor volumes were measured using a caliper and calculated using the formula: Volume

(mm<sup>3</sup>) = width<sup>2</sup> × length × 0.5. Tissue samples were collected and processed for further analysis. The tumors were then collected and analyzed by immunohistochemistry and Western blot. The heart, liver, spleen, lung, and kidney were dissected and fixed with 4% polyformaldehyde and stained with hematoxylin-and-eosin at room temperature for 1 min for further histological confirmation.

### RNA-seq assay

TE-1 cells were inoculated into a 6-cm culture dish at a density of  $2.5 \times 10^5$  cells/well during the exponential growth phase, and treated with chaetocin (0, 0.4, 0.8 μM) for 24 h ( $n = 2$ ). The cells were digested by Trizol according to the standard protocol, then collected and transferred to  $-80^{\circ}\text{C}$  for storage. The following steps including RNA isolation, cDNA library preparation and RNA-seq were completed by Beijing Genomics Institute (Beijing, China).

### Statistical analysis

Data were analyzed by SPSS 20.0 (Chicago, IL, USA) and graphs were generated by GraphPad Prism 6.0 (San Diego, CA, USA). All data were derived from at least three replicated independent experiments. One way analysis of variance (ANOVA) or Student's  $t$  test was performed for statistical analyses. The following terminology was considered statistically significant: \* $P < 0.05$ , \*\* $P < 0.01$ , \*\*\* $P < 0.001$ , \*\*\*\* $P < 0.0001$ .

## RESULTS

### Chaetocin suppresses the growth of ESCC cells

Chaetocin is a fungal metabolite with a thio-dioxopiperazine structure (Supplementary Figure 1A). We first investigated the cytotoxic effects of chaetocin on various ESCC cell lines (TE-1, TE-11, KYSE30, KYSE70, KYSE150, KYSE410, KYSE510, ECa109) and a normal esophageal epithelial cell line (Het-1A). Cells were treated with different concentrations of chaetocin for 24 h and cell viability was assayed using a CCK-8 assay. Chaetocin treatment significantly reduced ESCC cell viability, and the growth-suppressing effect of chaetocin was more pronounced against ESCC cells than normal Het-1 A cell (Supplementary Figure 1B and Supplementary Table 1). Surprisingly, IC<sub>50</sub> values of chaetocin to ESCC cells were lower than those of cisplatin (Supplementary Figure 1C and Supplementary Table 2), which is one of the most effective chemotherapeutic agents currently used to treat ESCC. TE-1 and KYSE150 cells were selected for subsequent studies, and chaetocin reduced ESCC cell viability in a dose-dependent manner (Figure 1A, 1B).

Next, we evaluated the effect of chaetocin on the formation of ESCC cell clones. TE-1 and KYSE150 cells were pretreated with different concentrations of chaetocin for 24 h, chaetocin reduced colony formation in a dose-dependent manner (Figure 1A, 1B). In addition, the anti-proliferative activity of chaetocin was evaluated using an EdU assay. Chaetocin significantly suppressed the proliferation of both TE-1 and KYSE150 cells (Figure 1C). Taken together, these results demonstrate that chaetocin inhibits the proliferation of ESCC cells *in vitro*.

### Chaetocin triggers mitotic arrest in ESCC cells

To determine whether chaetocin induces cell cycle arrest in ESCC cells, we performed cell cycle distribution analyses using flow cytometry. As shown in Figure 2A, after pretreatment with different concentrations of chaetocin for 24 h, the population of TE-1 and KYSE150 cells in the G2/M phase increased in a concentration-dependent manner compared with untreated cells, indicating that chaetocin inhibits ESCC cell proliferation by prompting G2/M phase arrest. To determine whether chaetocin induces ESCC cell cycle arrest in G2 or M phase, we further analyzed the expression of p-CDK1 and p-histone h3 using Western blotting. TE-1 and KYSE150 cells pretreated with different concentrations of chaetocin for 24 h exhibited a concentration-dependent decrease in the expression of p-CDK1, whereas the expression of p-histone h3 was increased with increasing chaetocin concentration (Figure 2B), indicating that chaetocin causes mitotic arrest in ESCC cells.

### Chaetocin induces ESCC cells apoptosis in a Caspase-dependent manner

We next examined whether chaetocin could induce apoptosis in ESCC cells. TE-1 and KYSE150 cells were treated with different concentrations of chaetocin for 24 h, after which apoptosis was assessed using an Annexin V-FITC/PI apoptosis assay. Compared with the control group, chaetocin treatment promoted the population of early and late apoptosis of ESCC cells in a dose-dependent manner (Figure 3A). To further confirm that chaetocin induced apoptosis of ESCC cells, the expression of apoptosis-related proteins was analyzed by Western blotting. As shown in Figure 3B, PARP and caspase-3 expression was activated by chaetocin treatment, and levels of the cleaved forms of these proteins increased in a concentration-dependent manner. Western blot analysis demonstrated that levels of the anti-apoptotic proteins BCL-2 decreased and the pre-apoptotic proteins BAX increased following chaetocin treatment. These results suggest that chaetocin induces apoptosis in ESCC cells.

To determine whether the chaetocin-induced apoptosis of ESCC cells is caspase-dependent, cells were treated with pan-caspase inhibitor z-VAD-fmk and chaetocin to induce apoptosis. However, treatment with the pan-caspase inhibitor z-VAD-fmk only partially suppressed chaetocin-induced apoptosis. As showed in Figure 3C, chaetocin did not induce necroptosis, as treatment with the necroptosis inhibitor necrostatin-1 had no effect on chaetocin-induced death of TE-1 and KYSE150 cells. In cells treated with the z-VAD-fmk and then chaetocin to induce apoptosis, z-VAD-fmk significantly blocked chaetocin-induced caspase pathway activation (Figure 3D). The apoptotic ESCC cell population following treatment with chaetocin was partially restored by z-VAD-fmk treatment (Figure 3E), indicating that chaetocin induces apoptosis in ESCC cells via the caspase pathway.

## Chaetocin induced the accumulation of ROS in ESCC cell

It has been previously reported that chaetocin induces apoptosis in gastric cancer and glioma cells through the accumulation of ROS [26, 27]. In the present study, analyses using a fluorescent DCFH/DA probe revealed that ROS levels in ESCC cells increased significantly upon chaetocin treatment (Figure 4A). Then, the cells were co-treated with NAC, a ROS scavenger, to inhibit the production of ROS. Subsequent flow cytometry analyses indicated that the accumulation of ROS induced by chaetocin in ESCC cells was almost completely reversed by NAC (Figure 4B). Flow cytometry also showed that NAC almost completely abolished chaetocin-induced apoptosis in TE-1 and KYSE150 cells (Figure 4C). Moreover, after co-

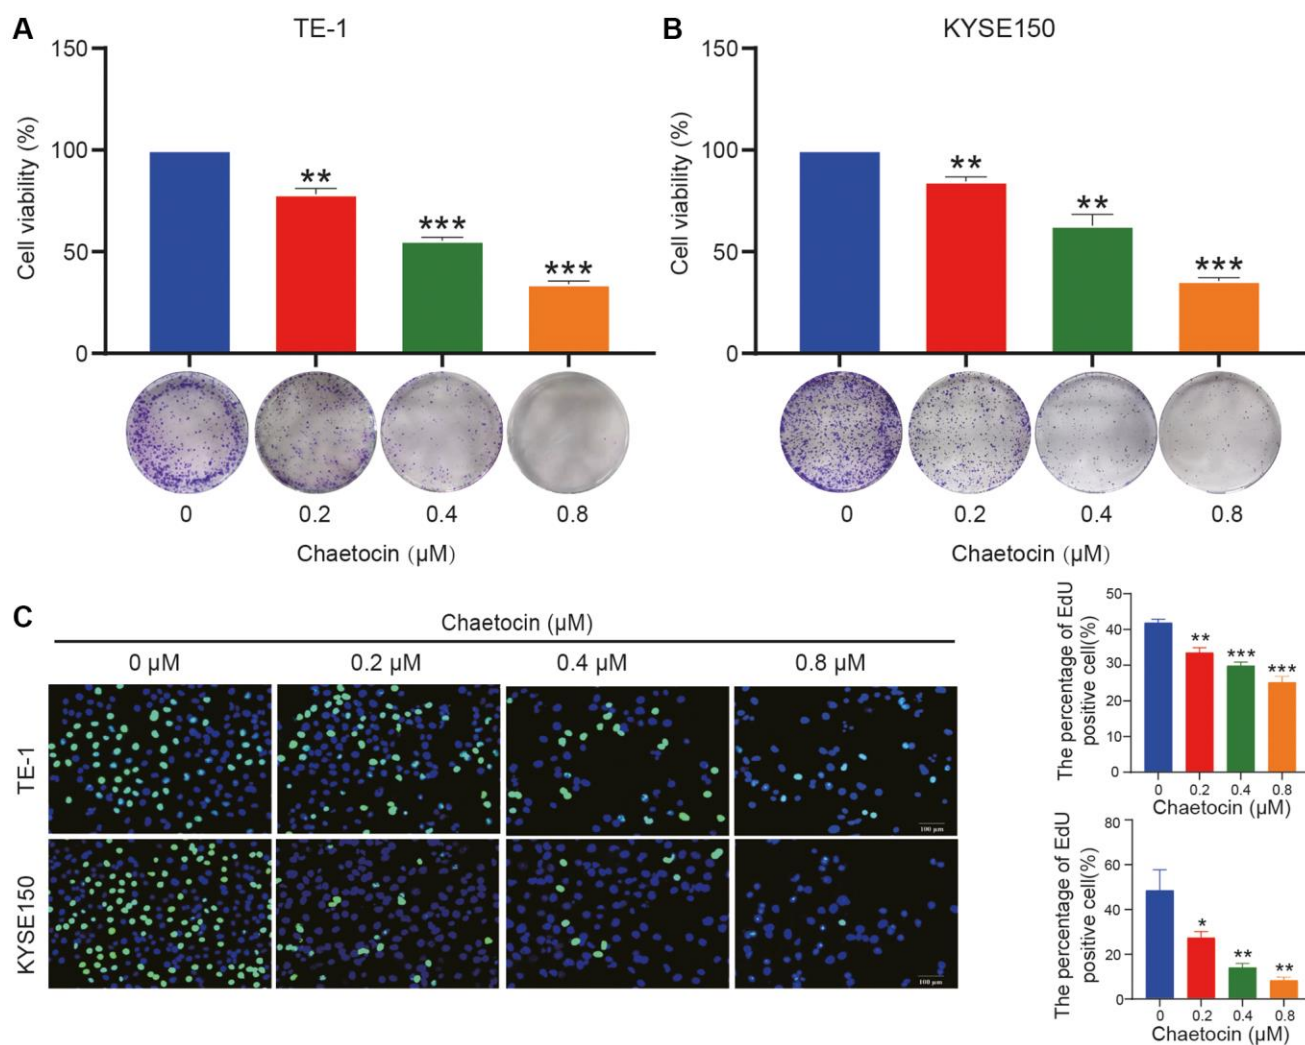

**Figure 1. Chaetocin suppresses the growth of ESCC cells.** (A, B) TE-1 and KYSE150 cells were treated with the indicated concentrations of chaetocin (0, 0.2, 0.4, and 0.8 μM) for 24 h. The cell viability was examined by CCK-8. The colony formation was evaluated after 14 days. (C) EdU assay was used to measure cell proliferation. The results are presented as the mean ± SD and are representative of at least three independent experiments. \* $P < 0.05$ , \*\* $P < 0.01$ , \*\*\* $P < 0.001$  compared with the control group.

treating with NAC, PARP, cleaved caspase-3, and Bcl-2 inhibited by chaetocin were reversed (Figure 4D). These results suggest that chaetocin induced the accumulation of ROS in ESCC cells, and apoptosis of ESCC cells is associated with ROS accumulation.

### The Hippo pathway is involved in chaetocin-induced ESCC cell suppresses

To fully explore the detailed molecular mechanism underlying chaetocin-mediated apoptosis and anti-proliferation effects, we conducted an RNA-seq analysis of chaetocin-treated TE-1 cells following treatments with 0.4  $\mu\text{M}$  or 0.8  $\mu\text{M}$  chaetocin for 24 h. After normalization and gene filtering, a total of 3736, 4347 and 774 up-regulated genes and 3578, 3678 and 572 down-regulated genes were identified in chaetocin (0.4  $\mu\text{M}$ ) vs. control, chaetocin (0.8  $\mu\text{M}$ ) vs. control, and chaetocin (0.8  $\mu\text{M}$ ) vs. chaetocin (0.4  $\mu\text{M}$ ) respectively (Figure 5A). We then assessed and categorized these differentially expressed genes (DEGs) in the different groups using Venn diagrams, which indicated that 470 up-regulated and 233

down-regulated genes were shared among the three groups (Figure 5B). Kyoto Encyclopedia of Genes and Genomes (KEGG) analysis showed that several pathways were affected by chaetocin treatment, and one of the most enriched pathways was the Hippo pathway (Figure 5C). As the Hippo pathway plays a pivotal role in esophageal squamous cell carcinoma development, we examined the Hippo-YAP pathway in relation to chaetocin-mediated cell death.

To elucidate the role of the Hippo signaling pathway in the enhanced anti-ESCC effect of chaetocin treatment, we examined the expression of central Hippo pathway molecules expression by immunoblotting using lysates of TE-1 and KYSE150 cells treated with chaetocin for 24 h. After chaetocin treatment, the phosphorylation levels of almost all core proteins in the Hippo pathway were elevated, such as MST1 (Thr183), MST2 (Thr180), MOB1 (Thr35), LAST1 (Thr1079 and Ser909), and YAP (Ser127), while total proteins were decreased (Figure 5D). Furthermore, chaetocin treatment was associated with suppressed levels of total YAP protein,

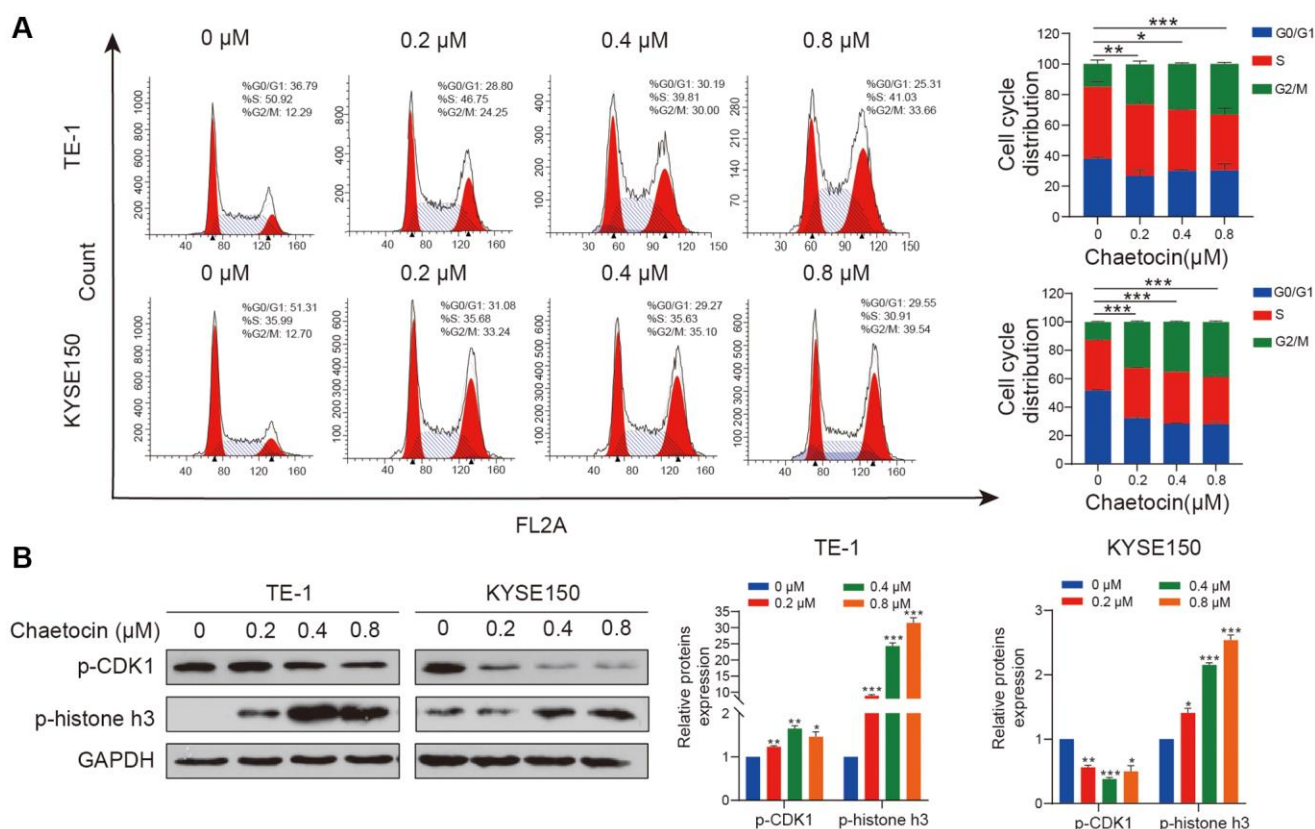

**Figure 2. Chaetocin triggers mitotic arrest in ESCC cells.** (A) TE-1 and KYSE150 cells were treated with the indicated concentrations of chaetocin (0, 0.2, 0.4 and 0.8  $\mu\text{M}$ ) for 24 h. The cell cycle distribution was analyzed using flow cytometry. The values indicate the mean  $\pm$  SD of three independent experiments. \* $P < 0.05$ , \*\* $P < 0.01$ , \*\*\* $P < 0.001$  compared with the control (one-way analysis of variance). (B) Protein expression of p-CDK1 and p-histone h3 was detected using western blot analysis. GAPDH was used as the loading control. Blots presented here are representative of three independent experiments. \* $P < 0.05$ , \*\* $P < 0.01$ , \*\*\* $P < 0.001$  compared with the control group.

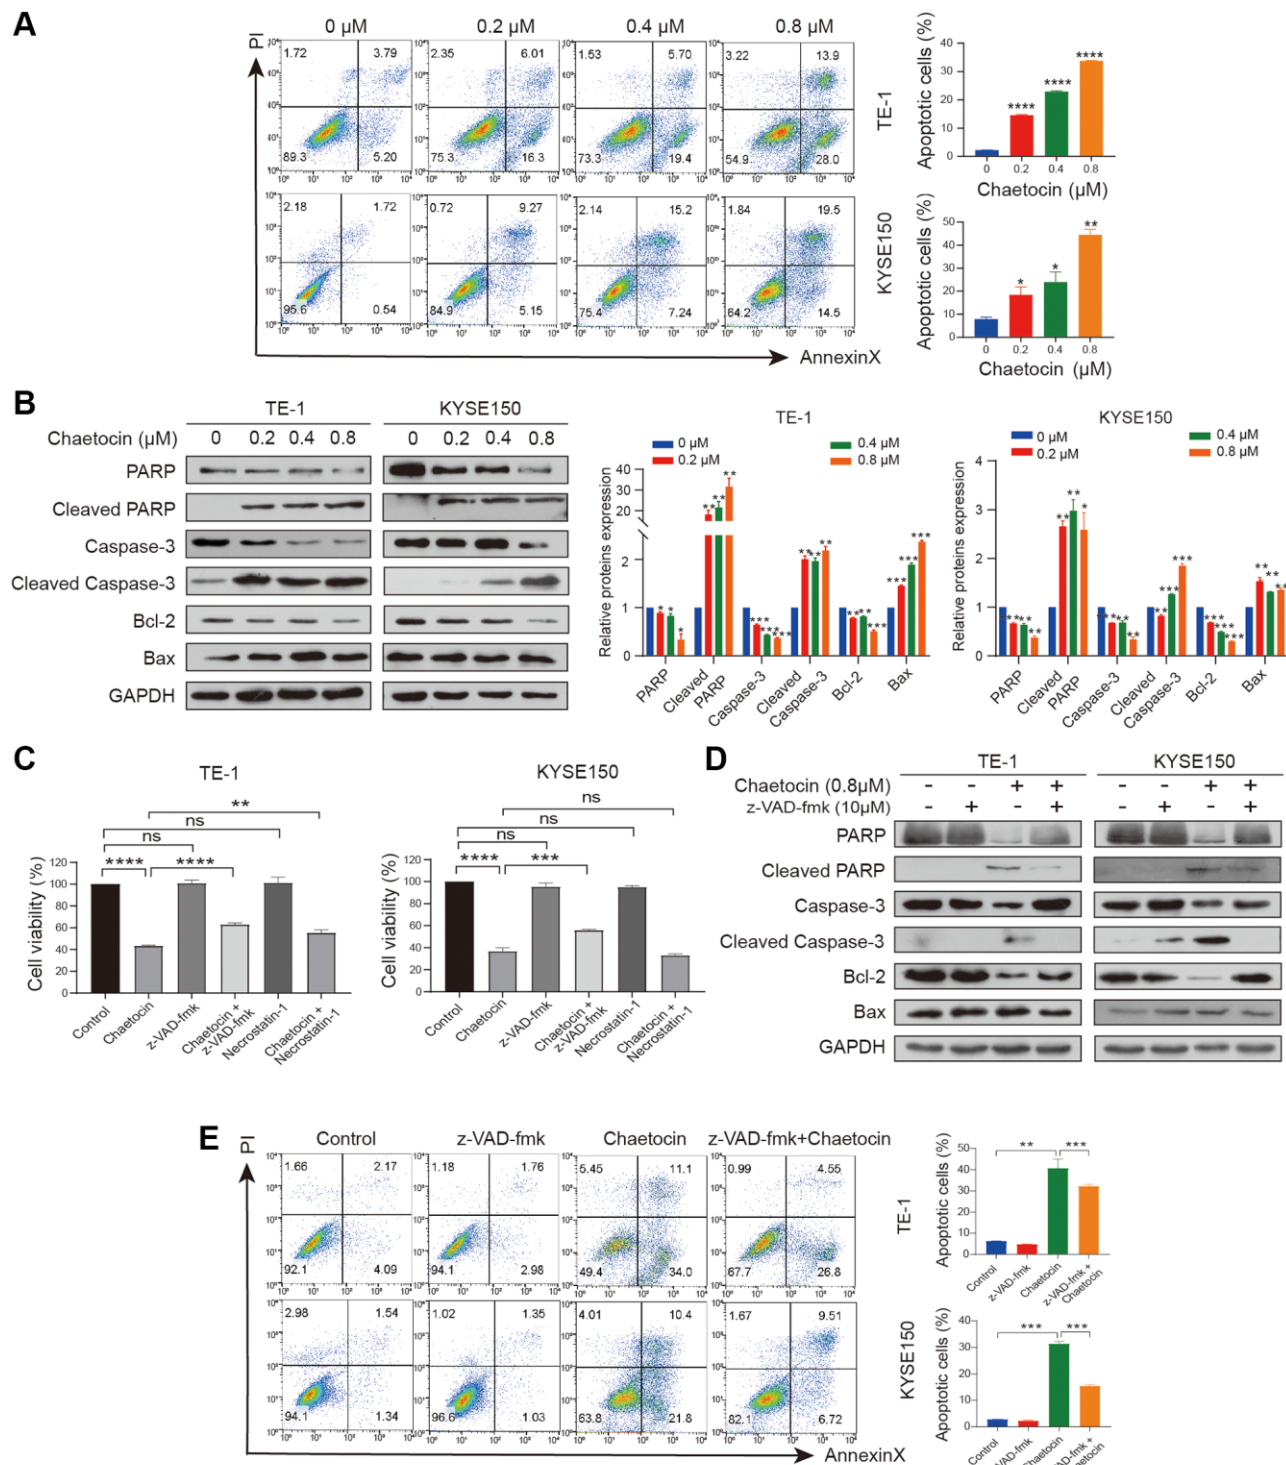

**Figure 3. Chaetocin induces ESCC cells apoptosis in a caspase-dependent manner.** (A) TE-1 and KYSE150 cells were treated with the indicated concentrations of chaetocin for 24 h, and apoptotic rates were detected using Annexin V/PI staining and flow cytometry. Results are shown as mean  $\pm$  SD of three independent experiments. \* $P$  < 0.05, \*\* $P$  < 0.01, \*\*\* $P$  < 0.001, \*\*\*\* $P$  < 0.0001 vs. control group. (B) Western blot analysis of PARP, Cleaved PARP, caspase-3, cleaved-caspase-3, Bax and Bcl-2 following treatment with 0–0.8  $\mu$ M chaetocin for 24 h. GAPDH was utilized as an internal standard. Blots presented here are representative of three independent experiments. \* $p$  < 0.05, \*\* $p$  < 0.01, \*\*\* $p$  < 0.001 compared with the control group. (C) TE-1 and KYSE150 cells were pretreated with Z-VAD-FMK (10  $\mu$ M, 2 h) or necrostatin-1 (20  $\mu$ M, 2 h) before chaetocin treatment (0.8  $\mu$ M, 24 h), and the cell viability was analyzed by CCK8 assay. (D) Expression levels of PARP, Cleaved PARP, caspase-3, cleaved-caspase-3, Bax and Bcl-2 were detected by western blot. GAPDH was used as the loading control. (E) Apoptosis was analyzed by flow cytometry. Results in (C) and (E) are shown as mean  $\pm$  SD of three independent experiments. \*\* $P$  < 0.01, \*\*\* $P$  < 0.001, \*\*\*\* $P$  < 0.0001, ns nonsignificant compared with the control group.

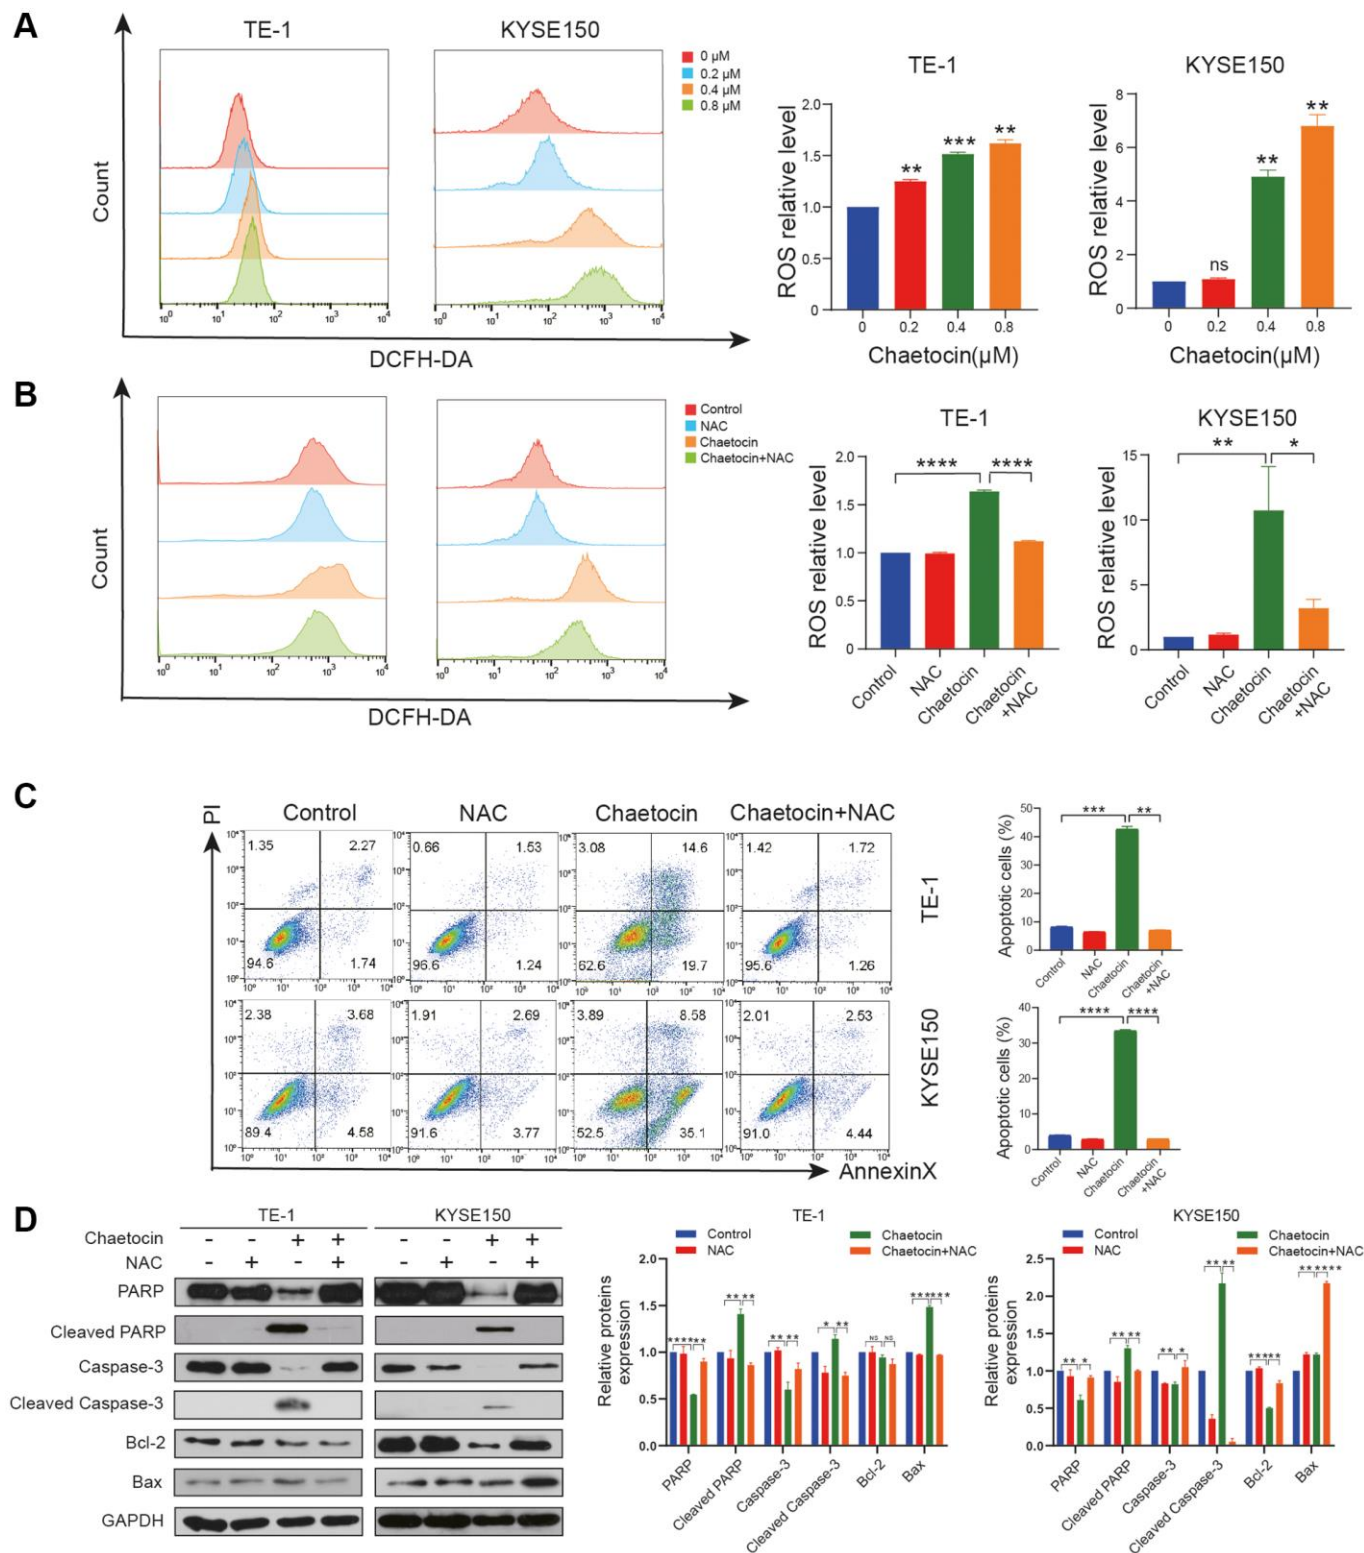

**Figure 4. Chaetocin induced the accumulation of ROS in ESCC cell.** (A, B) ROS levels were analyzed by flow cytometry in TE-1 and KYSE150 cells. Results were shown as mean  $\pm$  SD of three independent experiments. \* $P$  < 0.05, \*\* $P$  < 0.01, \*\*\* $P$  < 0.001, \*\*\*\* $P$  < 0.0001, ns nonsignificant compared with the control group. TE-1 and KYSE150 cells were pretreated with 5 mM NAC for 1 h and then cotreated with chaetocin (0.8  $\mu$ M). (C) Apoptosis was measured by flow cytometry. Results were shown as mean  $\pm$  SD of three independent experiments. \*\* $P$  < 0.01, \*\*\* $P$  < 0.001, \*\*\*\* $P$  < 0.0001. (D) Expression levels of PARP, Cleaved PARP, caspase-3, cleaved-caspase-3, Bax and Bcl-2 were detected by western blot. GAPDH was used as the loading control.

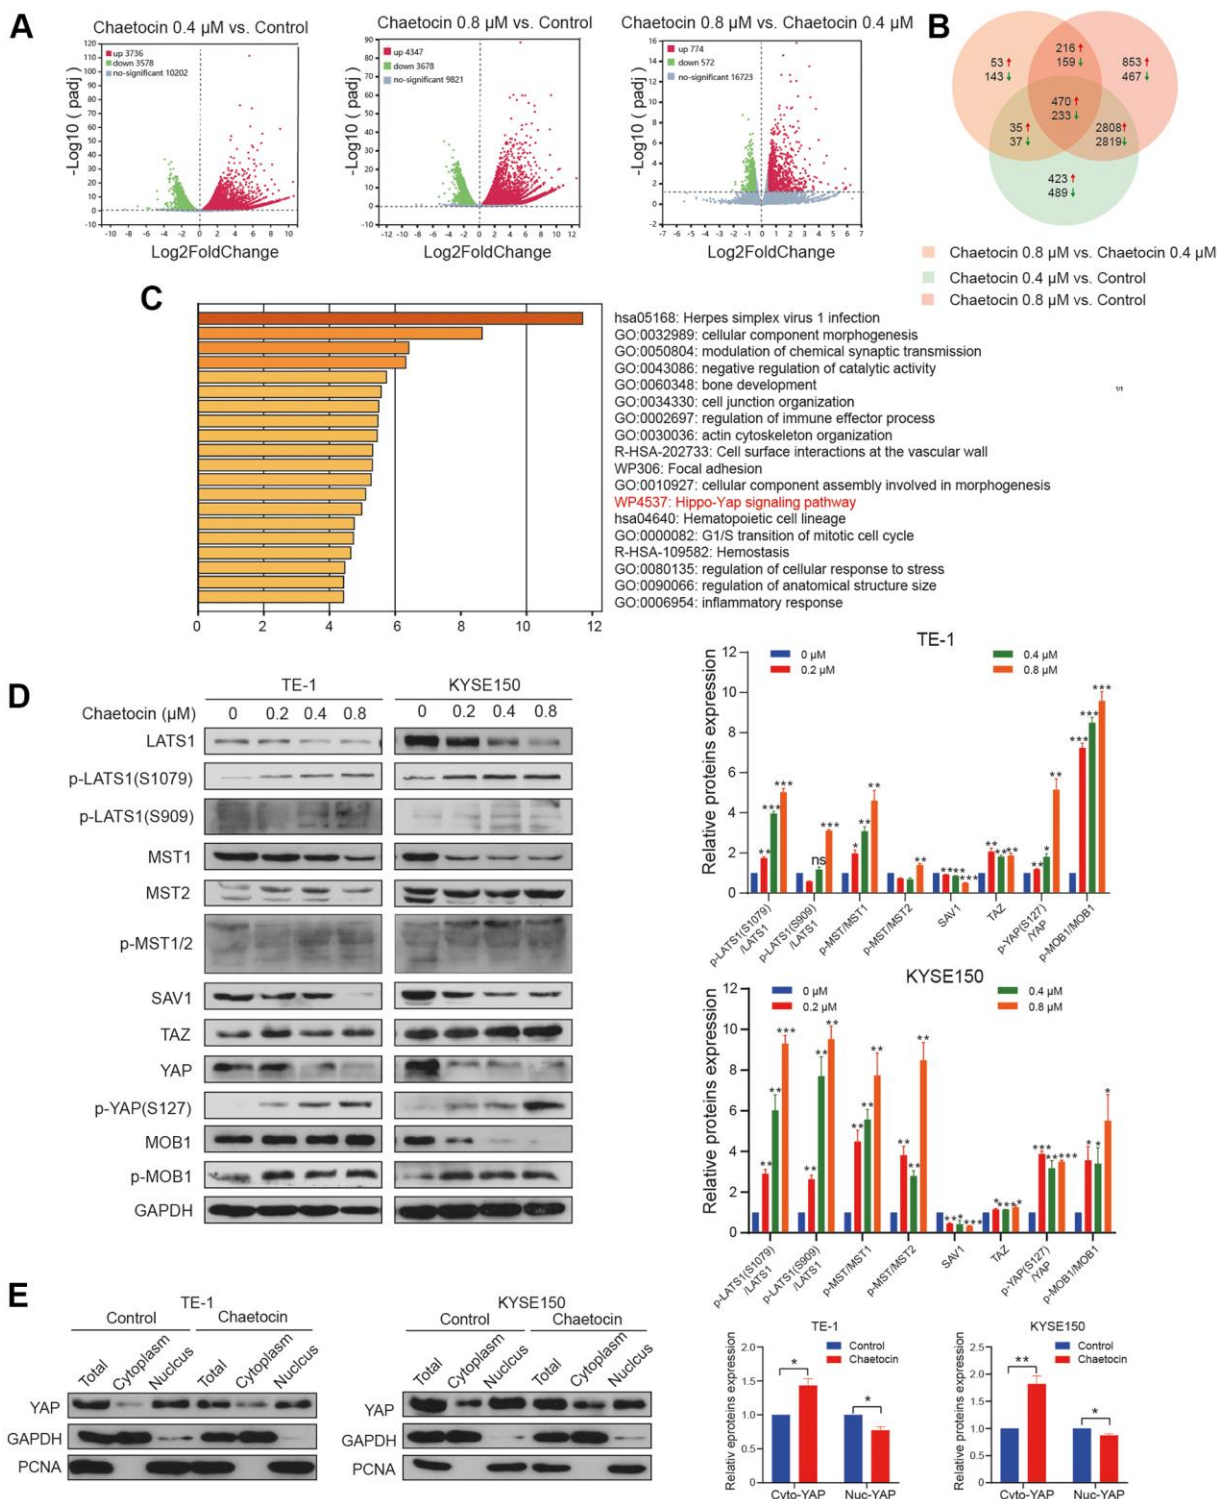

**Figure 5. The Hippo pathway is involved in chaetocin-induced ESCC cells apoptosis and anti-proliferation.** (A) RNA-seq was performed on non-treated TE-1 cells as well as TE-1 cells with 0.4  $\mu$ M and 0.8  $\mu$ M chaetocin treatment for 24 h. Volcano plots were used to analyze transcriptomic data, with the x-axis representing Log2FoldChange (sample/control) values and the y-axis representing the  $-\text{Log}_{10}$  (padj). Green, red, and gray circles respectively represent genes that were downregulated, upregulated, and not differentially regulated. (B) Venn diagrams demonstrating the numbers of up- and down-regulated transcripts associated with each treatment. (C) KEGG pathway enrichment analysis of DEGs that were specifically downregulated in the chaetocin treatment. (D) Representative western blot results showing changes in phosphorylation level of proteins in the Hippo pathway, including MST1/2, MOB1, LATS1, SAV1, and YAP, after chaetocin treatment. GAPDH was used as the loading control. (E) Cytosolic and nuclear proteins of TE-1 and KYSE150 cells treated with 0.8  $\mu$ M chaetocin for 24 h were separated to detect expression levels of YAP. GAPDH and PCNA were used as the loading controls.

which may be related to decreased nuclear translocation of the protein (Figure 5E). These results suggest that chaetocin might exhibit anticancer effects in ESCC cell via activating the Hippo pathway.

To further verify whether chaetocin exhibits anticancer effects via Hippo pathway in ESCC cells, TE-1 and KYSE150 cells were treated with the Mst1/2 inhibitor XMU-MP-1 (1  $\mu$ M) for 24 h before chaetocin treatment. XMU-MP-1 not only partially reversed the inhibitory effect chaetocin-induced cell proliferation, but also rescued the chaetocin-induced apoptosis in ESCC cells (Figure 6A, 6B). The phosphorylation levels of LATS1 (Ser1079 and Ser909), MOB1 (Thr35), and YAP (Ser127) were significantly reversed by XMU-MP-1, while total protein was increased (Figure 6C). Furthermore, lower levels of cleaved PARP in the XMU-MP-1 treatment group may indicate that the Mst1/2 inhibitor prevented the activation of apoptotic pathway, and rescued TE-1 and KYSE150 cells from chaetocin-induced apoptosis (Figure 6D). These data suggest that chaetocin exerts anticancer effects against ESCC via activating the Hippo pathway.

#### **Chaetocin suppresses the growth of ESCC cell xenografts**

To further explore the potential inhibitory effects of chaetocin on ESCC growth *in vivo*, we established a subcutaneous implanted tumor model in BALB/c nude mice. Seven days after implantation of KYSE150 cells, mice were randomly divided into two groups with 8 mice in each group. Mice in the control group were administered DMSO, and mice in the experimental group received chaetocin every day, both groups were given continuous intraperitoneal injection administration for 14 d. According to previous reports, 0.5 mg/kg/d was selected as the chaetocin administration dose [27]. Remarkably, chaetocin significantly inhibited tumor growth *in vivo*, significantly decreasing tumor volume and weight compared to the control group (Figure 7A–7E). There was no significant change in body weight during the 14 d of administration (Figure 7F). The relative weight of vital organs, including the heart, liver, spleen, lungs and kidneys, did not change significantly as well (Figure 7G). Moreover, H&E staining results showed no histological differences in the heart, liver, spleen, lungs and kidneys, indicating that a range of dosages of chaetocin is not toxic but can significantly retard the growth of ESCC cell xenografts (Figure 7I). Consistent with our *in vitro* results, tumor tissues in chaetocin-treated group exhibited decreased PARP, caspase-3 and YAP protein levels, while levels of cleaved PARP and p-YAP (Ser127) were increased (Figure 7H). Immunohistochemical staining showed increased levels

of both cleaved caspase-3 and p-YAP (Ser127), whereas levels of Ki-67 and YAP were decreased in chaetocin treated mice (Figure 7J). These results are consistent with those observed *in vitro*, suggesting that chaetocin inhibits the growth of ESCC and activates the Hippo pathways both *in vitro* and *in vivo*.

## **DISCUSSION**

ESCC is one of the most common and deadly cancers worldwide [1]. Pharmaceutical therapies such as chemotherapy, targeted therapy and immunotherapy are essential for ESCC treatment [28]. However, drug resistance is a major obstacle to achieving maximum therapeutic benefit for ESCC patients, as many patients have inherent or adaptive resistance to existing therapeutic agents [28]. Therefore, there is an urgent need to discover and develop novel agents to treat ESCC, and natural products, including marine natural products, remain a potentially important source of novel anticancer agents.

Chaetocin is a marine natural product belonging to the thiodiketopyrazine complexes first isolated in 1981 [29]. As we have reviewed, increasing evidence indicated that chaetocin exhibited potent anticancer activity against a diversity of human cancers, ranging from leukemia to solid tumors, both *in vivo* and *in vitro* [30]. In the present study, the results indicated that chaetocin not only inhibits the proliferation of ESCC cells, it also induces cell cycle arrest in the M phase. Moreover, chaetocin induces apoptosis of ESCC cells as well, characterized by the up-regulation of cleaved PARP, cleaved caspase-3, and Bcl-2 and the down-regulation of Bax. These findings clearly indicate that chaetocin treatment suppresses the malignant phenotype of ESCC.

The Hippo pathway has been reported to be associated with the progression of esophageal cancer. Frequent inactivation mutations of Hippo pathway have been confirmed and validated in ESCC [9, 10]. Interestingly, the poor-prognosis subtype of ESCC is characterized by the Hippo pathway inactivation [31]. YAP and TAZ, the core downstream effectors of the Hippo signaling pathway, are frequently overexpressed in ESCC patients and have become an independent predictor of poor prognosis [12, 32]. Reportedly, knockdown YAP or TAZ inhibits the growth of multiple cancer, including ESCC [12, 33, 34]. Bailey et al. used mouse genetic models and hPSC-derived 3D organoids to identify YAP as a key regulator of esophageal epithelial morphogenesis [35]. Therefore, these reports suggested that Hippo pathway may play a pivotal role in ESCC. Several small molecules have shown anti-esophageal cancer potential via the Hippo pathway *in vitro* and

*in vivo*. Sun et al. reported that gallic acid inhibits the growth of esophageal cancer cells through Hippo signaling pathway [36]. Song et al. identified a novel

YAP1 inhibitor with antitumor activity in esophageal adenocarcinoma [37]. Zhou et al. synthesized an arsenic nanocomplex that can make ESCC cancer cells

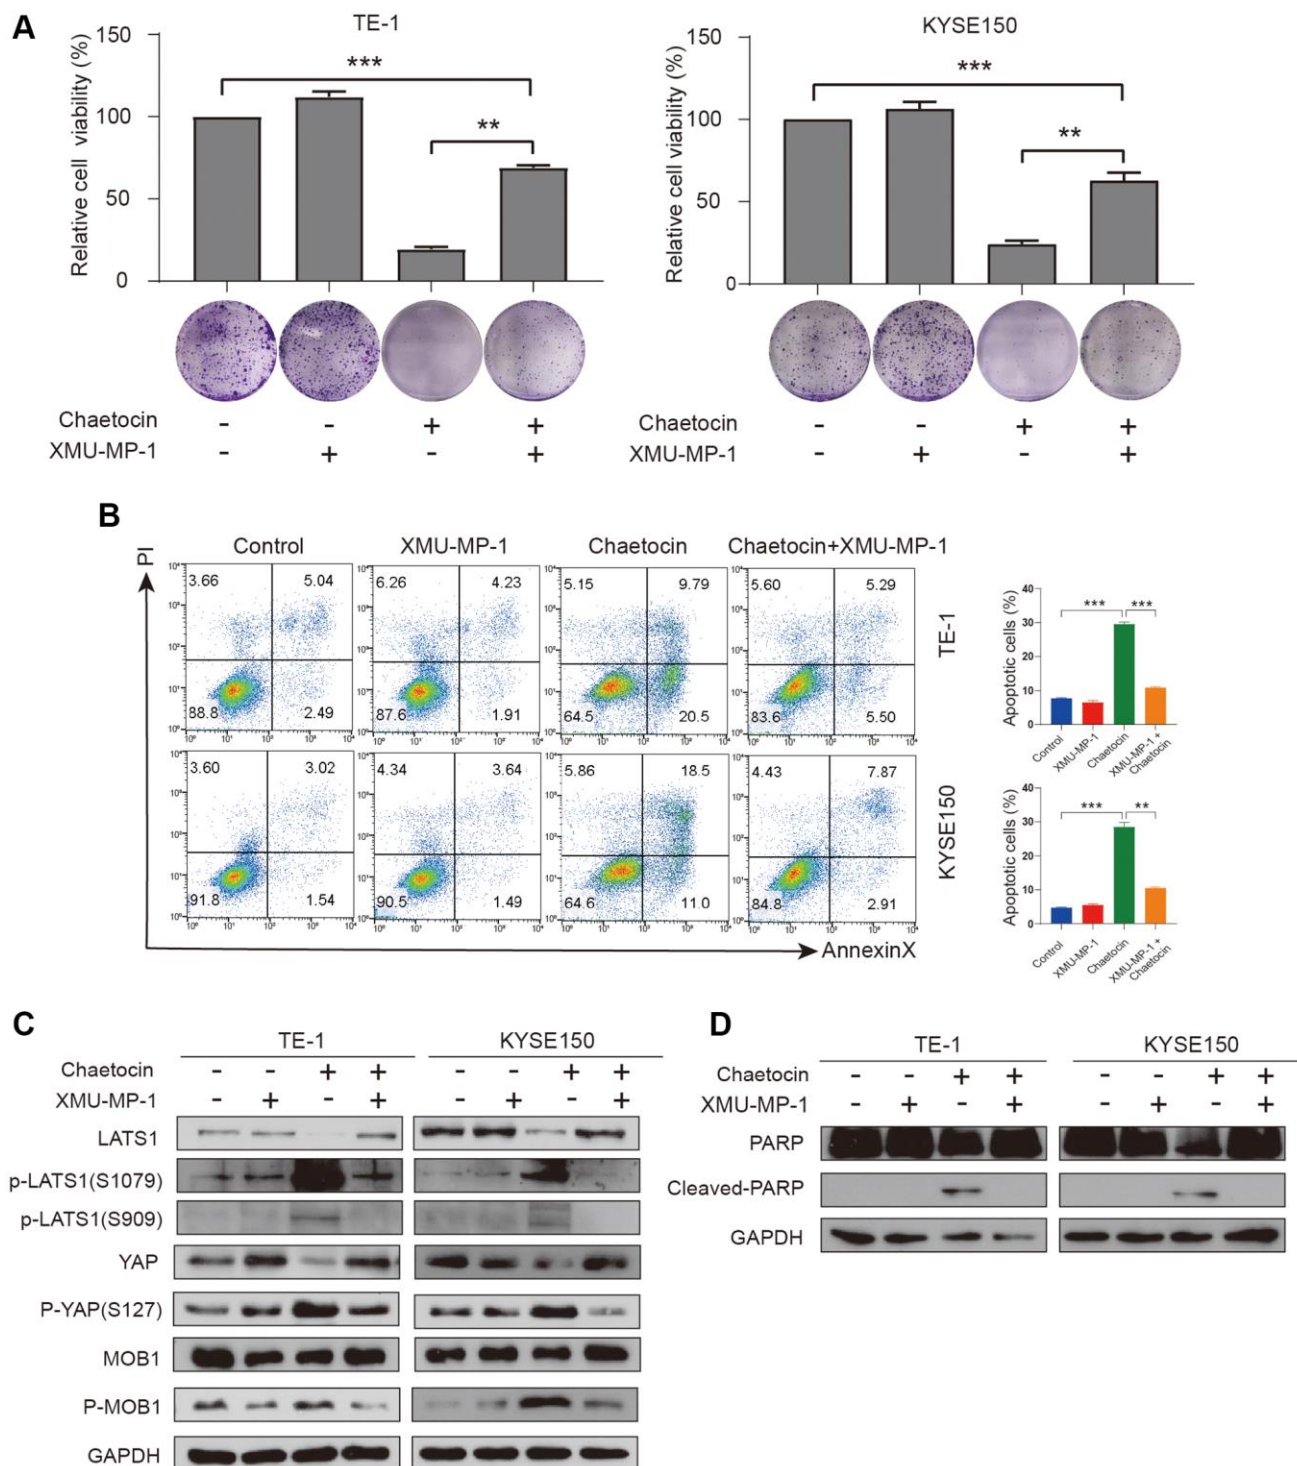

**Figure 6. XMU-MP-1 reverses inhibition and apoptosis of TE-1 and KYSE150 cells proliferation by chaetocin.** (A) TE-1 and KYSE150 cells were treated with chaetocin (0.8  $\mu$ M) in the presence and absence of 1  $\mu$ M XMU-MP1. The cell viability was examined by CCK-8. The colony formation was evaluated after 7 days. (B) Apoptosis was measured by flow cytometry. Results were shown as mean  $\pm$  SD of three independent experiments. \*\* $P$  < 0.01, \*\*\* $P$  < 0.001. (C) Expression levels of Hippo pathway proteins were analyzed through western blot. GAPDH was used as the loading control. (D) Expression levels of PARP, Cleaved PARP were detected by western blot. GAPDH was used as the loading control.

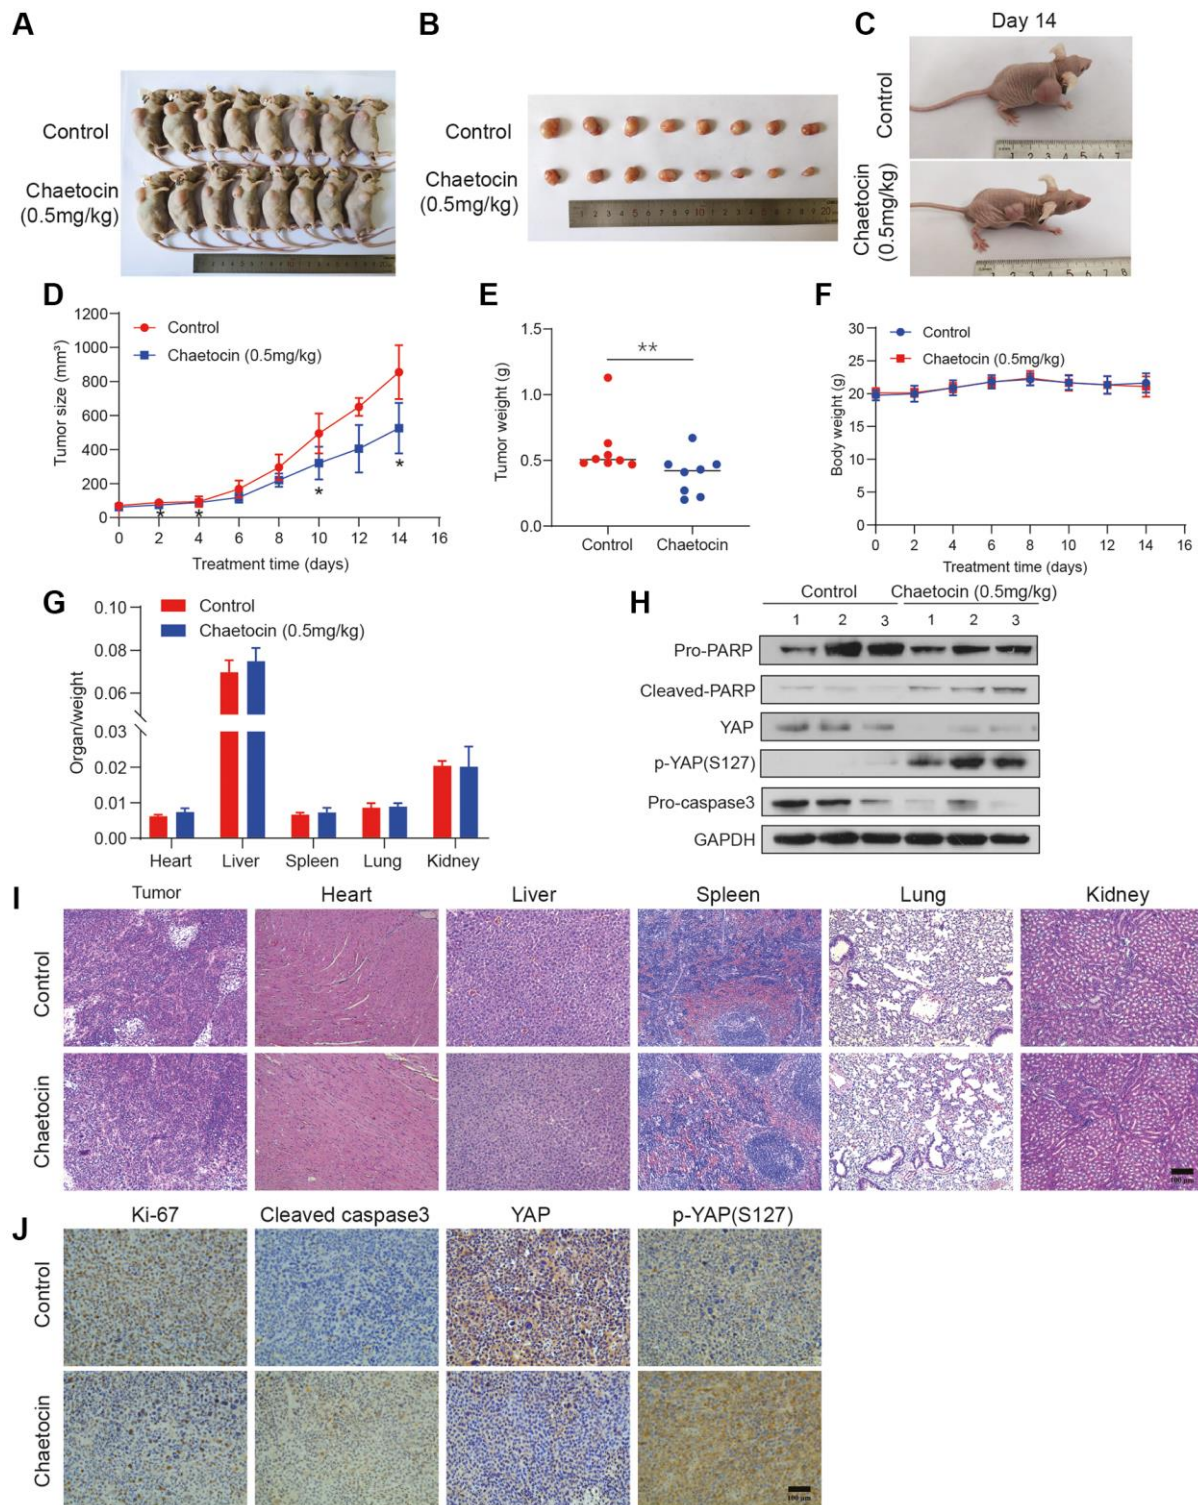

**Figure 7. Chaetocin suppresses the growth of ESCC cell xenografts.** (A) Representative photographs of a nude mouse model of xenograft tumors after control (vehicle), chaetocin (0.5 mg/kg) treatments were administered i.p. daily for 14 days. (B) Images of the tumor samples from each group. (C) The tumors of control mice and chaetocin-treated (0.5 mg/kg) mice on Day 15 are shown. (D) Tumor volumes were measured and calculated every other day. Error bars represent SD. \*\*\* $P < 0.001$  compared with the control using one-way analysis of variance. (E) Tumor mass was calculated. Error bars represent SD. \*\* $P < 0.01$  compared with the control group. (F) Body weight during administration of chaetocin. (G) Relative organ weights after two weeks of treatment with chaetocin. (H) Western blot was performed to detect the protein expression of PARP, Cleaved PARP, YAP, p-YAP (S127), and caspase-3 in xenograft tumor. GAPDH was used as the loading control. (I) Representative images of H&E staining for pathological examination of different tissues. (J) Immunohistochemical staining for Ki67, cleaved caspase-3, YAP and p-YAP (S127) in tumor sections. Data are expressed as mean  $\pm$  SD ( $n = 8$ ). \* $P < 0.05$ , \*\* $P < 0.01$  compared with the control group.

sensitive to radiotherapy and chemotherapy by degrading YAP [38].

Our RNA sequencing results indicated that the Hippo-YAP pathway is one of the most enriched pathways after chaetocin treatment for 24 h, we therefore evaluated whether chaetocin treatment could activate the Hippo pathway in ESCC cells. Surprisingly, we found that the Hippo signaling proteins MST1/2, MOB1, LATS1, and YAP were significantly decreased after chaetocin treatment of ESCC cell lines, while the phosphorylation levels of these proteins were significantly increased, resulting in decreased nuclear translocation of YAP. These indicate that chaetocin activates the Hippo pathway primarily via phosphorylation of these key effectors. The selective Mst1/2 inhibitor XMU-MP-1 not only partially restores cell viability and rescues the apoptosis induced by chaetocin, it also reverses chaetocin-induced phosphorylation of LATS1 (Ser1079 and Ser909) and YAP (Ser127). Collectively, our data thus suggested that chaetocin activates the Hippo pathway.

Considerable evidence suggested that carcinogenesis was related to the moderate elevation of intracellular ROS levels, while the excessive accumulation of ROS in cancer cells triggered cell death. Chaetocin reportedly

induces ROS accumulation, thereby significantly inhibiting the growth of cancer cells, such as gastric cancer and glioma [26, 27]. Recent studies have highlighted the relationship between oxidative stress and Hippo pathway, and shown that ROS could activate the Hippo pathway [15]. Therefore, some small molecule targeting ROS/Hippo is being investigated. Nakatani et al. reported that alantolactone inhibits YAP1/TAZ by promoting the accumulation of reactive oxygen species, thus inhibiting tumor growth [16]. Zhang et al. found that the production of intracellular ROS was significantly correlated with the antitumor activity of nitidine chloride and the down-regulation of YAP [39]. In the present study, we found that chaetocin significantly elevated intracellular ROS levels in ESCC cells as well, and the ROS scavenger NAC almost completely eliminated chaetocin induced apoptosis in ESCC cells. Moreover, chaetocin promotes intracellular ROS accumulation, which may be related to the activation of Hippo pathway.

The results of *in vivo* experiments indicated that tumor volume and tumor weight were significantly reduced after chaetocin treatment, while body weight did not change much. Moreover, no histological differences were noted in the heart, liver, spleen, lungs, and kidneys, suggesting no significant toxicity at a given

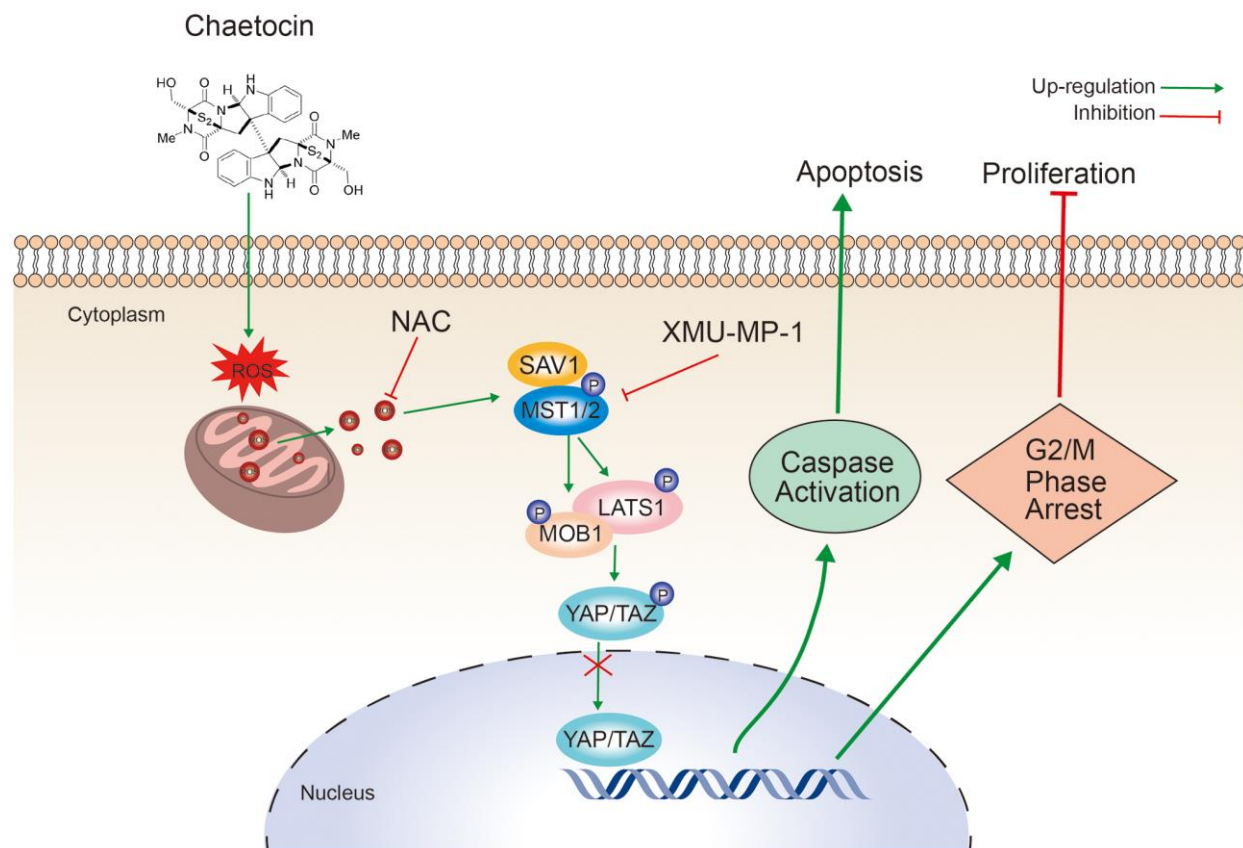

Figure 8. Schematic representation of the mechanism of the action of chaetocin in ESCC cells.

dose of chaetocin in xenografts. Notably, we observed marked increases in the levels of cleaved caspase-3 and phosphorylated YAP in the chaetocin-treated group, and a dramatic decrease in the level of total YAP, which is consistent with the results of *in vitro* experiments.

In summary, our data demonstrate that chaetocin could significantly inhibit ESCC cell proliferation, induce apoptosis, and induce cycle arrest in the M phase. Moreover, chaetocin could promote ROS accumulation and activate Hippo signaling pathway to exert anti-ESCC activity (Figure 8). These results provide an important basis for further research of chaetocin as a potential therapeutic or preventive candidate agent for ESCC treatment.

## Abbreviations

ESCC: Esophageal Squamous Cell Carcinoma; ROS: reactive oxygen species; MST: Mammalian Sterile20-like Kinase; MOB: MOBKL1; LAST1: large tumor suppressor kinase 1; YAP: Yes-associated protein 1 (YAP1); SAV1: salvador homolog 1; EdU: 5-Ethynyl-2'-deoxyuridine; CDK: Cyclin-dependent kinase; KEGG: Kyoto Encyclopedia of Genes and Genomes.

## AUTHOR CONTRIBUTIONS

Conceptualization, X.Z. and D.H.; methodology, L.L. and H.J.; validation, L.L., H.J. and Y.L.; formal analysis, L.L.; data curation, J.T.; writing — original draft preparation, H.J.; writing — review and editing, L.L. and X.X.; visualization, K.L. and Y.C.; supervision, D.H.; project administration, X.Z.; funding acquisition, X.Z. All authors have read and agreed to the published version of the manuscript.

## CONFLICTS OF INTEREST

The authors declare that the research was conducted in the absence of any commercial or financial relationships that could be construed as a potential conflict of interest.

## ETHICAL STATEMENT

The animal study protocol was approved by the Ethics Committee of North Sichuan Medical College (NSMC-2022-15, June 2022).

## FUNDING

This research was funded by City-School Cooperation Project of Nanchong City (20SXQT0047), the Natural

Science Foundation of Sichuan Province (20237F30473), and the Science and Technology Research Special Project of Sichuan Administration of Traditional Chinese Medicine (2020JC0077).

## Editorial note

\*This corresponding author has a verified history of publications using a personal email address for correspondence.

## REFERENCES

1. Sung H, Ferlay J, Siegel RL, Laversanne M, Soerjomataram I, Jemal A, Bray F. Global Cancer Statistics 2020: GLOBOCAN Estimates of Incidence and Mortality Worldwide for 36 Cancers in 185 Countries. *CA Cancer J Clin*. 2021; 71:209–49. <https://doi.org/10.3322/caac.21660> PMID: [33538338](https://pubmed.ncbi.nlm.nih.gov/33538338/)
2. Abnet CC, Arnold M, Wei WQ. Epidemiology of Esophageal Squamous Cell Carcinoma. *Gastroenterology*. 2018; 154:360–73. <https://doi.org/10.1053/j.gastro.2017.08.023> PMID: [28823862](https://pubmed.ncbi.nlm.nih.gov/28823862/)
3. Herskovic A, Russell W, Liptay M, Fidler MJ, Al-Sarraf M. Esophageal carcinoma advances in treatment results for locally advanced disease: review. *Ann Oncol*. 2012; 23:1095–103. <https://doi.org/10.1093/annonc/mdr433> PMID: [22003242](https://pubmed.ncbi.nlm.nih.gov/22003242/)
4. Shapiro J, van Lanschot JJB, Hulshof MCC, van Hagen P, van Berge Henegouwen MI, Wijnhoven BPL, van Laarhoven HWM, Nieuwenhuijzen GAP, Hossiers GAP, Bonenkamp JJ, Cuesta MA, Blaisse RJB, Busch ORC, et al, and CROSS study group. Neoadjuvant chemoradiotherapy plus surgery versus surgery alone for oesophageal or junctional cancer (CROSS): long-term results of a randomised controlled trial. *Lancet Oncol*. 2015; 16:1090–8. [https://doi.org/10.1016/S1470-2045\(15\)00040-6](https://doi.org/10.1016/S1470-2045(15)00040-6) PMID: [26254683](https://pubmed.ncbi.nlm.nih.gov/26254683/)
5. Al-Batran SE, Homann N, Pauligk C, Goetze TO, Meiler J, Kasper S, Kopp HG, Mayer F, Haag GM, Luley K, Lindig U, Schmiegel W, Pohl M, et al, and FLOT4-AIO Investigators. Perioperative chemotherapy with fluorouracil plus leucovorin, oxaliplatin, and docetaxel versus fluorouracil or capecitabine plus cisplatin and epirubicin for locally advanced, resectable gastric or gastro-oesophageal junction adenocarcinoma (FLOT4): a randomised, phase 2/3 trial. *Lancet*. 2019; 393:1948–57. [https://doi.org/10.1016/S0140-6736\(18\)32557-1](https://doi.org/10.1016/S0140-6736(18)32557-1) PMID: [30982686](https://pubmed.ncbi.nlm.nih.gov/30982686/)

6. Wu S, Huang J, Dong J, Pan D. hippo encodes a Ste-20 family protein kinase that restricts cell proliferation and promotes apoptosis in conjunction with salvador and warts. *Cell*. 2003; 114:445–56.  
[https://doi.org/10.1016/s0092-8674\(03\)00549-x](https://doi.org/10.1016/s0092-8674(03)00549-x)  
PMID:12941273
7. Mohajan S, Jaiswal PK, Vatanmakarian M, Yousefi H, Sankaralingam S, Alahari SK, Koul S, Koul HK. Hippo pathway: Regulation, deregulation and potential therapeutic targets in cancer. *Cancer Lett*. 2021; 507:112–23.  
<https://doi.org/10.1016/j.canlet.2021.03.006>  
PMID:33737002
8. Kulkarni A, Chang MT, Vissers JHA, Dey A, Harvey KF. The Hippo Pathway as a Driver of Select Human Cancers. *Trends Cancer*. 2020; 6:781–96.  
<https://doi.org/10.1016/j.trecan.2020.04.004>  
PMID:32446746
9. Gao YB, Chen ZL, Li JG, Hu XD, Shi XJ, Sun ZM, Zhang F, Zhao ZR, Li ZT, Liu ZY, Zhao YD, Sun J, Zhou CC, et al. Genetic landscape of esophageal squamous cell carcinoma. *Nat Genet*. 2014; 46:1097–102.  
<https://doi.org/10.1038/ng.3076>  
PMID:25151357
10. Liang J, Wang Y, Cai L, Liu J, Yan J, Chen X, Wu X, Chen Q. Comparative Genomic Analysis Reveals Genetic Variations in Multiple Primary Esophageal Squamous Cell Carcinoma of Chinese Population. *Front Oncol*. 2022; 12:868301.  
<https://doi.org/10.3389/fonc.2022.868301>  
PMID:35515115
11. Song S, Li Y, Xu Y, Ma L, Pool Pizzi M, Jin J, Scott AW, Huo L, Wang Y, Lee JH, Bhutani MS, Weston B, Shanbhag ND, et al. Targeting Hippo coactivator YAP1 through BET bromodomain inhibition in esophageal adenocarcinoma. *Mol Oncol*. 2020; 14:1410–26.  
<https://doi.org/10.1002/1878-0261.12667>  
PMID:32175692
12. Khosravi A, Jafari SM, Asadi J. Knockdown of TAZ decrease the cancer stem properties of ESCC cell line YM-1 by modulation of Nanog, OCT-4 and SOX2. *Gene*. 2021; 769:145207.  
<https://doi.org/10.1016/j.gene.2020.145207>  
PMID:33031893
13. Maehama T, Nishio M, Otani J, Mak TW, Suzuki A. The role of Hippo-YAP signaling in squamous cell carcinomas. *Cancer Sci*. 2021; 112:51–60.  
<https://doi.org/10.1111/cas.14725>  
PMID:33159406
14. Yan J, Shi L, Lin S, Li Y. MicroRNA-624-mediated ARRDC3/YAP/HIF1 $\alpha$  axis enhances esophageal squamous cell carcinoma cell resistance to cisplatin and paclitaxel. *Bioengineered*. 2021; 12:5334–47.  
<https://doi.org/10.1080/21655979.2021.1938497>  
PMID:34415232
15. Zheng J, Yu H, Zhou A, Wu B, Liu J, Jia Y, Xiang L. It takes two to tango: coupling of Hippo pathway and redox signaling in biological process. *Cell Cycle*. 2020; 19:2760–75.  
<https://doi.org/10.1080/15384101.2020.1824448>  
PMID:33016196
16. Nakatani K, Maehama T, Nishio M, Otani J, Yamaguchi K, Fukumoto M, Hikasa H, Hagiwara S, Nishina H, Mak TW, Honma T, Kondoh Y, Osada H, et al. Alantolactone is a natural product that potently inhibits YAP1/TAZ through promotion of reactive oxygen species accumulation. *Cancer Sci*. 2021; 112:4303–16.  
<https://doi.org/10.1111/cas.15079>  
PMID:34289205
17. Zhang S, Yin J, Zhong J. Chaetocin reactivates the lytic replication of Epstein-Barr virus from latency via reactive oxygen species. *Sci China Life Sci*. 2017; 60:66–71.  
<https://doi.org/10.1007/s11427-016-0286-7>  
PMID:28063010
18. Dong JY, He HP, Shen YM, Zhang KQ. Nematicidal epipolysulfanyldioxopiperazines from *Gliocladium roseum*. *J Nat Prod*. 2005; 68:1510–3.  
<https://doi.org/10.1021/np0502241>  
PMID:16252916
19. Wu M, Zhang M, Ma Y, Liu F, Chen S, Lu J, Chen H. Chaetocin attenuates gout in mice through inhibiting HIF-1 $\alpha$  and NLRP3 inflammasome-dependent IL-1 $\beta$  secretion in macrophages. *Arch Biochem Biophys*. 2019; 670:94–103.  
<https://doi.org/10.1016/j.abb.2019.06.010>  
PMID:31255694
20. Chen MY, Zhang ZH, Ke JF, Li TT, Li MF, Lu JX, Li LX. Chaetocin attenuates atherosclerosis progression and inhibits vascular smooth muscle cell phenotype switching. *J Cardiovasc Transl Res*. 2022; 15:1270–82.  
<https://doi.org/10.1007/s12265-022-10258-5>  
PMID:35428928
21. Li Z, Huang L, Wei L, Hou Z, Ye W, Huang S. Chaetocin induces caspase-dependent apoptosis in ovarian cancer cells via the generation of reactive oxygen species. *Oncol Lett*. 2019; 18:1915–21.  
<https://doi.org/10.3892/ol.2019.10507>  
PMID:31423261
22. Yang Z, Wang H, Zhang N, Xing T, Zhang W, Wang G, Li C, Yu C. Chaetocin Abrogates the Self-Renewal of Bladder Cancer Stem Cells via the Suppression of the KMT1A-GATA3-STAT3 Circuit. *Front Cell Dev Biol*.

- 2020; 8:424.  
<https://doi.org/10.3389/fcell.2020.00424>  
 PMID:32626701
23. Wang H, Wen C, Chen S, Li W, Qin Q, He L, Wang F, Chen J, Ye W, Li W, Peng J, Yang X, Liu H. ROS/JNK/C-Jun Pathway is Involved in Chaetocin Induced Colorectal Cancer Cells Apoptosis and Macrophage Phagocytosis Enhancement. *Front Pharmacol.* 2021; 12:729367.  
<https://doi.org/10.3389/fphar.2021.729367>  
 PMID:34776955
  24. Xiang X, Tian Y, Hu J, Xiong R, Bautista M, Deng L, Yue Q, Li Y, Kuang W, Li J, Liu K, Yu C, Feng G. Fangchinoline exerts anticancer effects on colorectal cancer by inducing autophagy via regulation AMPK/mTOR/ULK1 pathway. *Biochem Pharmacol.* 2021; 186:114475.  
<https://doi.org/10.1016/j.bcp.2021.114475>  
 PMID:33609560
  25. Xiang X, Xiong R, Yu C, Deng L, Bie J, Xiao D, Chen Z, Zhou Y, Li X, Liu K, Feng G. Tex10 promotes stemness and EMT phenotypes in esophageal squamous cell carcinoma via the Wnt/ $\beta$ -catenin pathway. *Oncol Rep.* 2019; 42:2600–10.  
<https://doi.org/10.3892/or.2019.7376>  
 PMID:31638260
  26. Ozyerli-Goknar E, Sur-Erdem I, Seker F, Cingöz A, Kayabolun A, Kahya-Yesil Z, Uyulur F, Gezen M, Tolay N, Erman B, Gönen M, Dunford J, Oppermann U, Bagci-Onder T. The fungal metabolite chaetocin is a sensitizer for pro-apoptotic therapies in glioblastoma. *Cell Death Dis.* 2019; 10:894.  
<https://doi.org/10.1038/s41419-019-2107-y>  
 PMID:31772153
  27. Wen C, Wang H, Wu X, He L, Zhou Q, Wang F, Chen S, Huang L, Chen J, Wang H, Ye W, Li W, Yang X, et al. ROS-mediated inactivation of the PI3K/AKT pathway is involved in the antgastric cancer effects of thioredoxin reductase-1 inhibitor chaetocin. *Cell Death Dis.* 2019; 10:809.  
<https://doi.org/10.1038/s41419-019-2035-x>  
 PMID:31649256
  28. He S, Xu J, Liu X, Zhen Y. Advances and challenges in the treatment of esophageal cancer. *Acta Pharm Sin B.* 2021; 11:3379–92.  
<https://doi.org/10.1016/j.apsb.2021.03.008>  
 PMID:34900524
  29. Sekita S, Yoshihira K, Natori S, Udagawa S, Muroi T, Sugiyama Y, Kurata H, Umeda M. Mycotoxin production by Chaetomium spp. and related fungi. *Can J Microbiol.* 1981; 27:766–72.  
<https://doi.org/10.1139/m81-119>  
 PMID:7296410
  30. Jiang H, Li Y, Xiang X, Tang Z, Liu K, Su Q, Zhang X, Li L. Chaetocin: A review of its anticancer potentials and mechanisms. *Eur J Pharmacol.* 2021; 910:174459.  
<https://doi.org/10.1016/j.ejphar.2021.174459>  
 PMID:34464601
  31. Mai Z, Yuan J, Yang H, Fang S, Xie X, Wang X, Xie J, Wen J, Fu J. Inactivation of Hippo pathway characterizes a poor-prognosis subtype of esophageal cancer. *JCI Insight.* 2022; 7:e155218.  
<https://doi.org/10.1172/jci.insight.155218>  
 PMID:35993362
  32. Muramatsu T, Imoto I, Matsui T, Kozaki K, Haruki S, Sudol M, Shimada Y, Tsuda H, Kawano T, Inazawa J. YAP is a candidate oncogene for esophageal squamous cell carcinoma. *Carcinogenesis.* 2011; 32:389–98.  
<https://doi.org/10.1093/carcin/bgq254>  
 PMID:21112960
  33. Zhao J, Li X, Yang Y, Zhu D, Zhang C, Liu D, Wu K, Zhao S. Effect of YAP1 silencing on esophageal cancer. *Onco Targets Ther.* 2016; 9:3137–46.  
<https://doi.org/10.2147/OTT.S102338>  
 PMID:27307755
  34. Cui M, Li Z. Downregulation of YAP inhibits proliferation and induces apoptosis in Eca-109 cells. *Exp Ther Med.* 2018; 15:1048–52.  
<https://doi.org/10.3892/etm.2017.5492>  
 PMID:29403552
  35. Bailey DD, Zhang Y, van Soldt BJ, Jiang M, Suresh S, Nakagawa H, Rustgi AK, Aceves SS, Cardoso WV, Que J. Use of hPSC-derived 3D organoids and mouse genetics to define the roles of YAP in the development of the esophagus. *Development.* 2019; 146:dev178855.  
<https://doi.org/10.1242/dev.178855>  
 PMID:31748205
  36. Sun GL, Wang D. Gallic acid from *Terminalia chebula* inhibited the growth of esophageal carcinoma cells by suppressing the Hippo signal pathway. *Iran J Basic Med Sci.* 2020; 23:1401–8.  
<https://doi.org/10.22038/ijbms.2020.42283.9982>  
 PMID:33235697
  37. Song S, Xie M, Scott AW, Jin J, Ma L, Dong X, Skinner HD, Johnson RL, Ding S, Ajani JA. A Novel YAP1 Inhibitor Targets CSC-Enriched Radiation-Resistant Cells and Exerts Strong Antitumor Activity in Esophageal Adenocarcinoma. *Mol Cancer Ther.* 2018; 17:443–54.  
<https://doi.org/10.1158/1535-7163.MCT-17-0560>  
 PMID:29167315
  38. Zhou W, Liu M, Li X, Zhang P, Li J, Zhao Y, Sun G, Mao W. Arsenic nano complex induced degradation of YAP sensitized ESCC cancer cells to radiation and chemotherapy. *Cell Biosci.* 2020; 10:146.  
<https://doi.org/10.1186/s13578-020-00508-x>

PMID:[33353561](#)

39. Zhang J, Wu L, Lian C, Lian S, Bao S, Zhang J, Wang P, Ma J, Li Y. Nitidine chloride possesses anticancer property in lung cancer cells through activating Hippo signaling pathway. *Cell Death Discov.* 2020; 6:91.

<https://doi.org/10.1038/s41420-020-00326-7>

PMID:[33024576](#)

# SUPPLEMENTARY MATERIALS

## Supplementary Figure

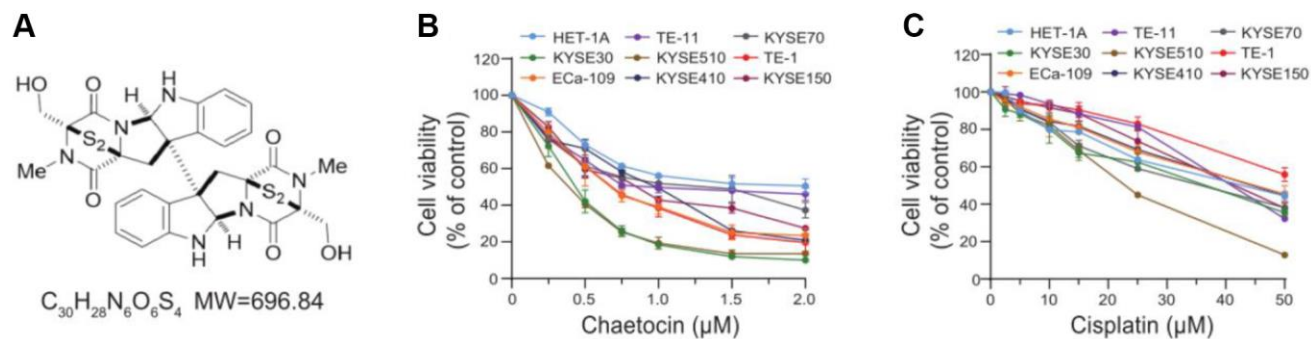

**Supplementary Figure 1. Chaetocin suppresses the growth of ESCC cells.** (A) Chemical structure of chaetocin. (B) Followed by treatment with chaetocin at the indicated concentrations for 24 h, CCK8 assay was used to measure the cell viability of ESCC cells. (C) Followed by treatment with cisplatin at the indicated concentrations for 24 h, CCK8 assay was used to measure the cell viability of ESCC cells.

## Supplementary Tables

**Supplementary Table 1. Effects on viability of chaetocin to ESCC cells and HET-1A.**

| Cell line | IC50 (μM) |
|-----------|-----------|
| Het-1A    | 1.62      |
| KYSE30    | 0.75      |
| KYSE410   | 1.06      |
| KYSE510   | 0.36      |
| KYSE70    | 1.68      |
| ECa-109   | 1.36      |
| TE-1      | 0.67      |
| TE-11     | 1.21      |
| KYSE150   | 0.85      |

**Supplementary Table 2. Effects on viability of cisplatin to ESCC cells and HET-1A.**

| Cell line | IC50 (μM) |
|-----------|-----------|
| Het-1A    | 39.16     |
| KYSE30    | 30.36     |
| KYSE410   | 42.13     |
| KYSE510   | 19.71     |
| KYSE70    | 33.49     |
| ECa-109   | 42.62     |
| TE-1      | 60.19     |
| TE-11     | 39.04     |
| KYSE150   | 39.95     |
