# Supplementary material for: Chaetocin exhibits anticancer effects in esophageal squamous cell carcinoma via activation of hippo pathway
Source: publisher site journal article supplement (doi:10.18632/aging.204801), 2023-06-14
Supplement: Supplementary file [file aging-v15i12-204801-supplementary-material-SD1.pdf]

## SUPPLEMENTARY FIGURE

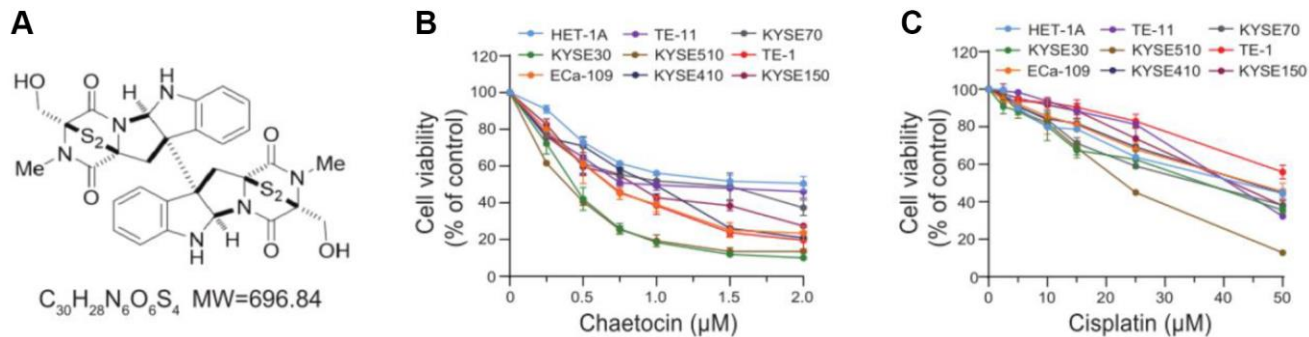

**Supplementary Figure 1. Chaetocin suppresses the growth of ESCC cells.** (A) Chemical structure of chaetocin. (B) Followed by treatment with chaetocin at the indicated concentrations for 24 h, CCK8 assay was used to measure the cell viability of ESCC cells. (C) Followed by treatment with cisplatin at the indicated concentrations for 24 h, CCK8 assay was used to measure the cell viability of ESCC cells.
